# Supplementary material for: DNA aptamers for the recognition of HMGB1 from Plasmodium falciparum
Source: PubMed Central journal article supplement (PMC6456224; doi:10.1371/journal.pone.0211756), 2019-04-09
Supplement: pone.0211756.s005.pdf [file pone.0211756.s005.pdf]

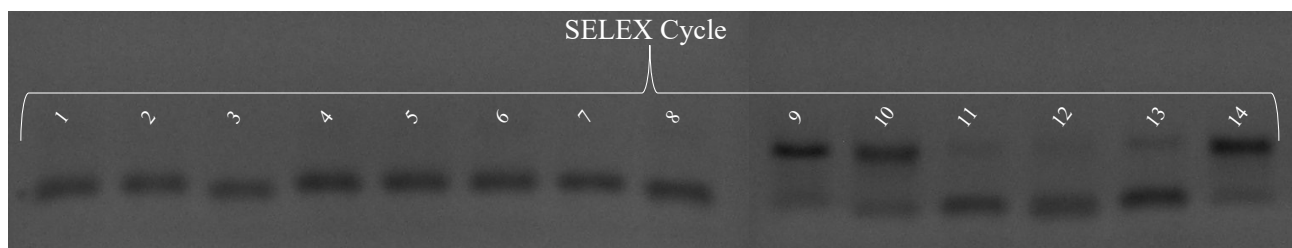

**S1 Fig. Aptamer enrichment analysis by the DiVE assay. See materials and methods for further details.**
