# Supplementary material for: DNA aptamers for the recognition of HMGB1 from Plasmodium falciparum
Source: PubMed Central journal article supplement (PMC6456224; doi:10.1371/journal.pone.0211756), 2019-04-09
Supplement: pone.0211756.s007.pdf [file pone.0211756.s007.pdf]

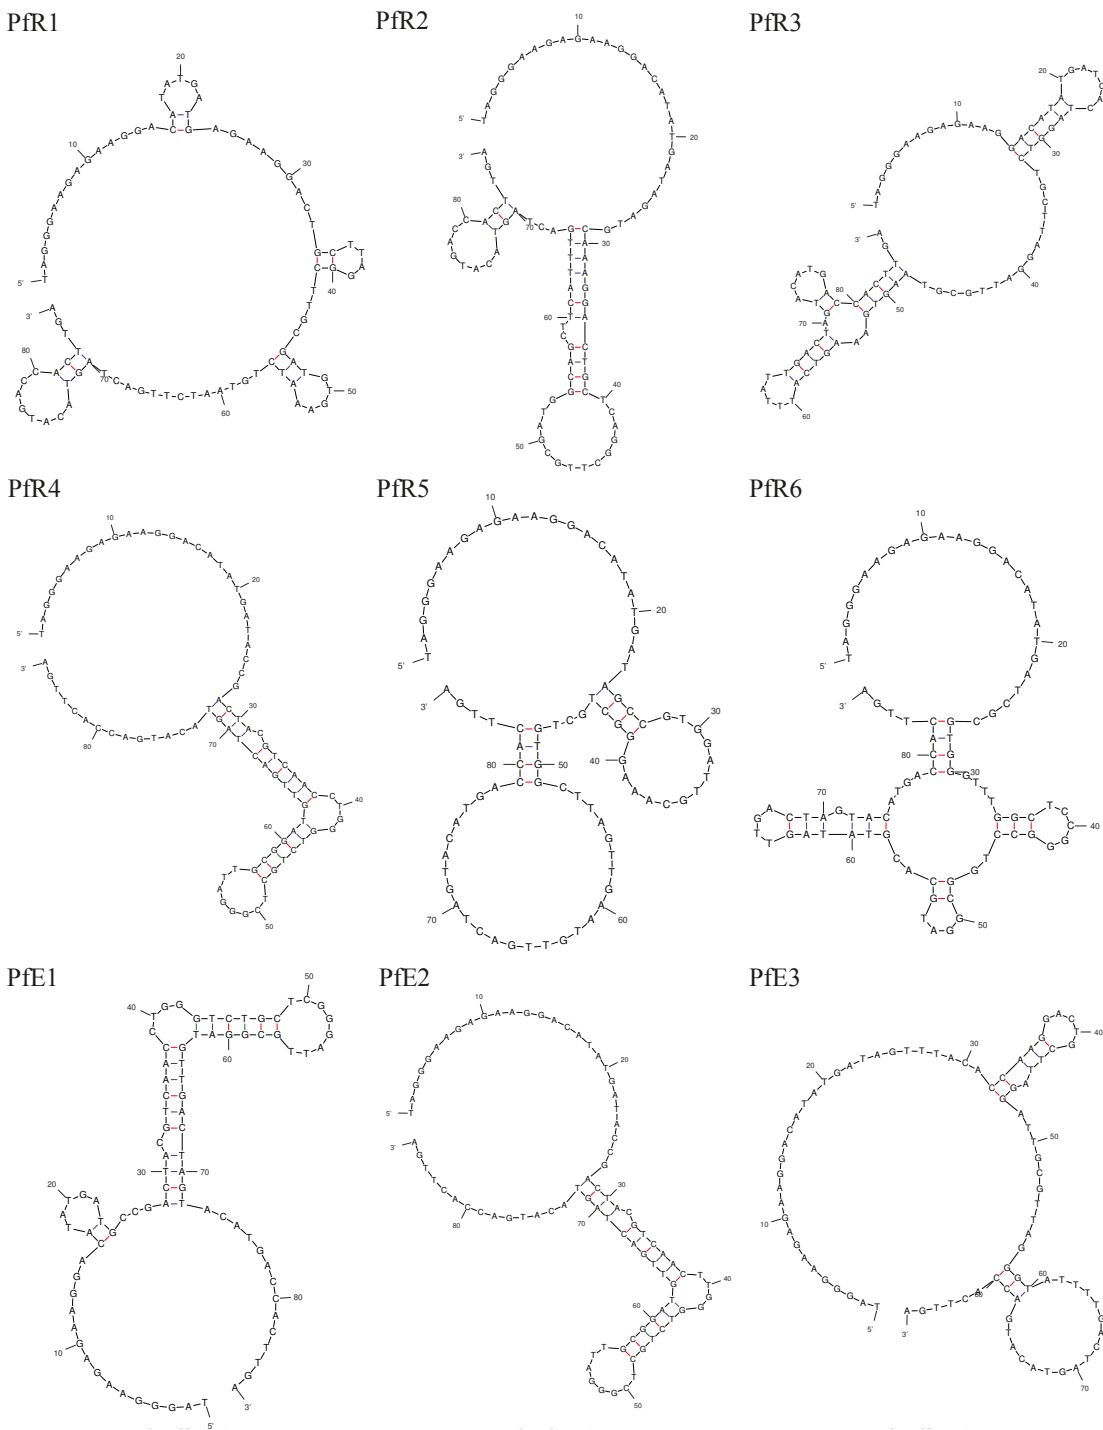

**S3 Fig. Secondary structures of top-ranked and enriched aptamers.** Here, we show the N40 variable region of the aptamers, including the flanking 5' (TAGGGAAGAGAAGGACATATGAT) and 3' (TTGACTAGTACATGACCACTTGA) regions. Secondary structures were predicted considering the flanking regions, at 25°C, 100 mM Na<sup>+</sup>, and 3 mM Mg<sup>+2</sup>, using the Mfold web server.
