# Supplementary material for: DNA aptamers for the recognition of HMGB1 from Plasmodium falciparum
Source: PubMed Central journal article supplement (PMC6456224; doi:10.1371/journal.pone.0211756), 2019-04-09
Supplement: pone.0211756.s008.pdf [file pone.0211756.s008.pdf]

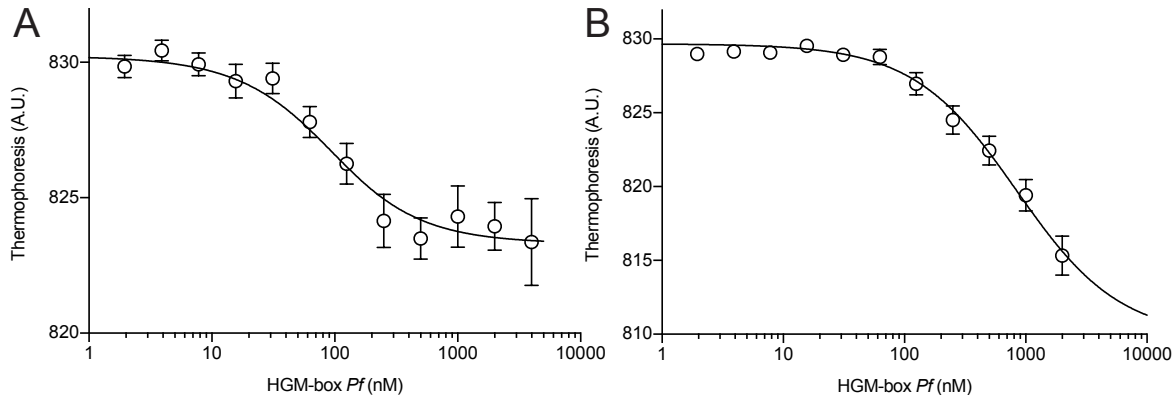

**S4 Fig. MST analysis of the aptamer-HGM-box complex formation.** (A) Thermophoresis changes of PfR6 as a function of HGM-box *Pf* concentration. Continuous line shows the non-linear regression using a quadratic equation, allowing to estimate a  $K_d$  of  $64 \pm 20$  nM and a thermophoretic amplitude of 7 AU. (B) As A for the PfE3 aptamer. The estimated  $K_d$  was  $740 \pm 120$  nM and an amplitude of 16 AU. Specificity assessment for PfR6.
