# Supplementary material for: DNA aptamers for the recognition of HMGB1 from Plasmodium falciparum
Source: PubMed Central journal article supplement (PMC6456224; doi:10.1371/journal.pone.0211756), 2019-04-09
Supplement: pone.0211756.s009.pdf [file pone.0211756.s009.pdf]

PfR1

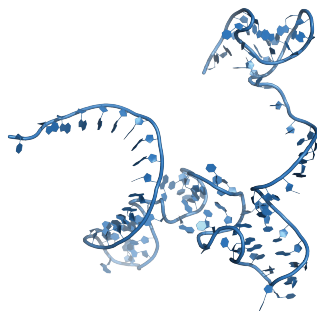

PfR2

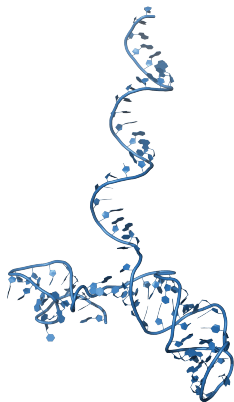

PfR3

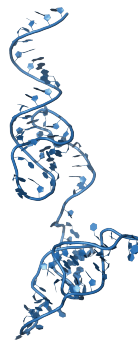

PfR4

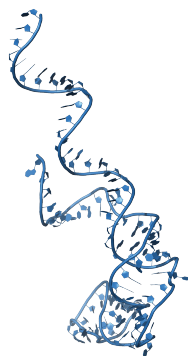

PfR5

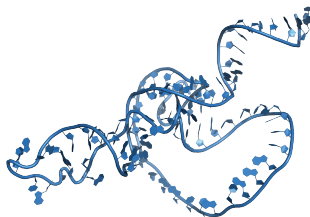

PfR6

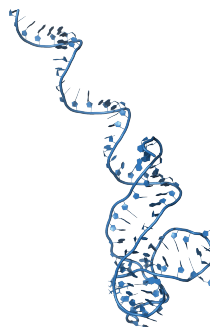

PfE1

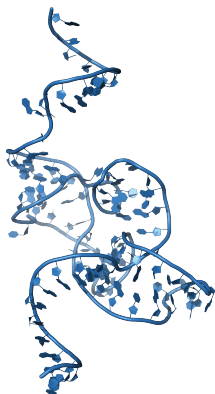

PfE2

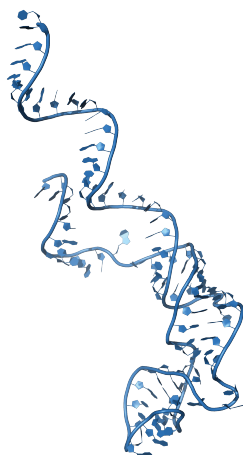

PfE3

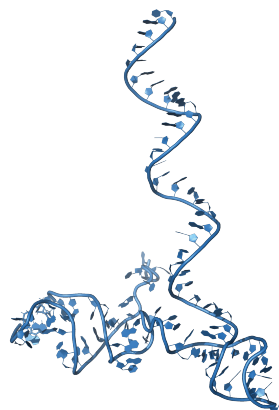

**S5 Fig. Tertiary structures of top-ranked and enriched aptamers.** Here, we show the N40 variable region of the aptamers, including the flanking 5' (TAGGGAAGAGAAGGACATATGAT) and 3' (TTGACTAGTACATGACCACTGA) regions. Secondary structures were predicted considering the flanking regions, at 25°C, 100 mM Na<sup>+</sup>, and 3 mM Mg<sup>+2</sup>, using the Mfold web server. A 3-D ssRNA model was built through RNacomposer server and using VMD molefacture and PSF builder the ssRNA structure was transformed into a ssDNA structure. Finally, the structure was minimized using Namd software.
