# Supplementary material for: DNA aptamers for the recognition of HMGB1 from Plasmodium falciparum
Source: PubMed Central journal article supplement (PMC6456224; doi:10.1371/journal.pone.0211756), 2019-04-09
Supplement: pone.0211756.s010.pdf [file pone.0211756.s010.pdf]

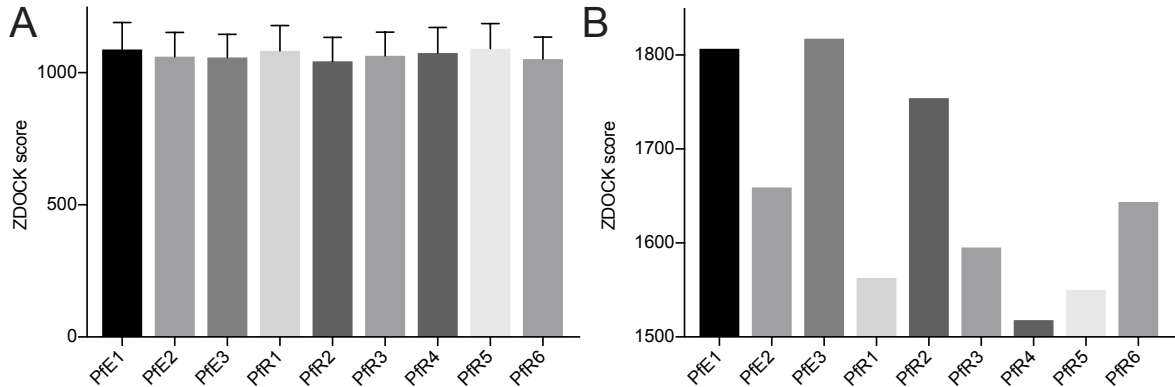

**S6 Fig. Averaged ZDOCK scores for the PfR6–HMG-box *Pf* complex.** Binding of the selected aptamers 3D ssDNA structures to the HMG-box *Pf* were predicted using ZDOCK server. A) The ZDOCK score of 2,000 iterations were averaged using Graphpad Prism 7.02. B) Highest ZDOCK score of each aptamer.
