# Supplementary material for: DNA aptamers for the recognition of HMGB1 from Plasmodium falciparum
Source: PubMed Central journal article supplement (PMC6456224; doi:10.1371/journal.pone.0211756), 2019-04-09
Supplement: pone.0211756.s011.pdf [file pone.0211756.s011.pdf]

| PlasmoDB ID   | Candidate                                       | 3D Structure                                |
|---------------|-------------------------------------------------|---------------------------------------------|
| PF3D7_1202900 | High mobility group protein B1<br>(HMGB1)       | 1CG7 (Predicted from <i>S. cerevisiae</i> ) |
| PF3D7_1243600 | Translation initiation factor SUI1,<br>putative | 2IF1 (Predicted from <i>H. sapiens</i> )    |
| PF3D7_0818200 | 14-3-3 protein (14-3-3I)                        | 1IB1 (Predicted from <i>O. aries</i> )      |
| PF3D7_1444800 | Fructose-biphosphate aldolase<br>(FBPA)         | 1A5C*                                       |
| PF3D7_1365900 | Tetraubiquitin                                  | 1F9J (Predicted from <i>H. sapiens</i> )    |

**S1 Table. Potential biomarkers for *Plasmodium falciparum* infection as proposed by the algorithm in Fig 1.**
