# Supplementary material for: DNA aptamers for the recognition of HMGB1 from Plasmodium falciparum
Source: PubMed Central journal article supplement (PMC6456224; doi:10.1371/journal.pone.0211756), 2019-04-09
Supplement: pone.0211756.s012.pdf [file pone.0211756.s012.pdf]

| SELEX | Volume<br>( $\mu\text{L}$ ) | ssDNA<br>(pmol) | ssDNA<br>( $\mu\text{M}$ ) | HMG-box <i>Pf</i><br>(pmol) | HMG-box <i>Pf</i><br>( $\mu\text{M}$ ) | ssDNA/<br>HMG-box <i>Pf</i> | Incubation<br>(min) | #<br>washes | PCR<br>cycles | dsDNA<br>(pmol) | Transcription<br>(min) | RNA<br>(pmol) | cDNA<br>(pmol) |
|-------|-----------------------------|-----------------|----------------------------|-----------------------------|----------------------------------------|-----------------------------|---------------------|-------------|---------------|-----------------|------------------------|---------------|----------------|
| 1     | 200                         | 1000            | 5.00                       | 104.5                       | 0.52                                   | 9.57                        | 60                  | 0           | 6             | 34.98           | 120                    | 1008.98       | 168.35         |
| 2     | 200                         | 150             | 0.75                       | 53.2                        | 0.27                                   | 2.82                        | 60                  | 1           | 12            | 43.21           | 120                    | 1057.61       | 296.30         |
| 3     | 200                         | 150             | 0.75                       | 53.2                        | 0.27                                   | 2.82                        | 45                  | 2           | 10            | 26.56           | 120                    | 2304.53       | 221.47         |
| 4     | 200                         | 125             | 0.63                       | 53.2                        | 0.27                                   | 2.35                        | 30                  | 2           | 10            | 37.41           | 120                    | 857.84        | 142.54         |
| 5     | 200                         | 125             | 0.63                       | 53.2                        | 0.27                                   | 2.35                        | 30                  | 3           | 10            | 28.25           | 120                    | 1267.12       | 210.62         |
| 6     | 200                         | 160             | 0.80                       | 53.2                        | 0.27                                   | 3.01                        | 30                  | 3           | 10            | 16.46           | 120                    | 2424.24       | 154.51         |
| 7     | 200                         | 140             | 0.70                       | 53.2                        | 0.27                                   | 2.63                        | 30                  | 3           | 8             | 7.11            | 120                    | 1510.29       | 129.82         |
| 8     | 200                         | 115             | 0.58                       | 53.2                        | 0.27                                   | 2.16                        | 20                  | 3           | 8             | 22.63           | 120                    | 1231.95       | 51.25          |
| 9     | 200                         | 50              | 0.25                       | 24.7                        | 0.12                                   | 2.02                        | 20                  | 3           | 8             | 41.71           | 120                    | 2020.20       | 97.27          |
| 10    | 300                         | 80              | 0.27                       | 24.7                        | 0.08                                   | 3.24                        | 20                  | 3           | 12            | 51.07           | 120                    | 743.36        | 289.19         |
| 11    | 300                         | 200             | 0.67                       | 24.7                        | 0.08                                   | 8.10                        | 20                  | 3           | 12            | 54.43           | 120                    | 414.14        | 194.54         |
| 12    | 500                         | 160             | 0.32                       | 24.7                        | 0.05                                   | 6.48                        | 15                  | 3           | 12            | 41.15           | 120                    | 414.14        | 144.67         |
| 13    | 1000                        | 115             | 0.12                       | 15.2                        | 0.02                                   | 7.57                        | 15                  | 3           | 22            | 12.35           | 120                    | 1167.23       | 144.78         |
| 14    | 1500                        | 115             | 0.08                       | 15.2                        | 0.01                                   | 7.57                        | 15                  | 3           | 15            | 49.20           | 120                    | 2394.31       | 56.12          |

**S2 Table. Reactants and products quantities and concentrations, as well as conditions in each SELEX cycle.**
